# Supplementary material
Source: PubMed Central journal article supplement (PMC3985824)

## Online Supporting Material

**SUPPLEMENTAL TABLE 1** Healthy Diet Indicator components and scoring criteria

| <b>Healthy Diet Indicator Scoring</b>  |                                              |                           |
|----------------------------------------|----------------------------------------------|---------------------------|
| <b>Component</b>                       | <b>Score = 0</b>                             | <b>Score = 1</b>          |
| Saturated fatty acids (% energy)       | >10                                          | 0-10                      |
| Polyunsaturated fatty acids (% energy) | <6 and >10                                   | 6-10                      |
| Protein (% energy)                     | <10 and >15                                  | 10-15                     |
| Total carbohydrates (% energy)         | <50 and >70                                  | 50-70                     |
| Sugar (% energy)                       | >10                                          | 0-10                      |
| Dietary Fibre (g/day)                  | <18 and >32                                  | 18-32                     |
| Cholesterol (mg/d)                     | >300                                         | 0-300                     |
| Fruits and Vegetables <sup>1</sup>     | Less frequent than daily consumption of both | Daily consumption of both |

<sup>1</sup>The weight of fruit and vegetables consumed was not available so this component was modified from the original scoring used (1 =  $\geq$ 400g/day; 0 = < 400g/day) to the consumption of both fruit and vegetables daily.

## Online Supporting Material

**SUPPLEMENTAL TABLE 2** Elderly Dietary Index components and scoring criteria

| <b>Elderly Dietary Index Scoring</b> |                                   |                                                                          |                                  |                                              |
|--------------------------------------|-----------------------------------|--------------------------------------------------------------------------|----------------------------------|----------------------------------------------|
| <b>Component</b>                     | <b>Score = 1</b>                  | <b>Score = 2</b>                                                         | <b>Score = 3</b>                 | <b>Score = 4</b>                             |
| Meat                                 | ≥3 days/week                      | Never/rarely                                                             | <1 day/week                      | 1-2 days/week                                |
| Fish/Seafood                         | Never/rarely                      | <1 day/week                                                              | ≥3 days/week                     | 1-2 days/week                                |
| Legumes                              | Never/rarely                      | <1 day/week                                                              | ≥3 days/week                     | 1-2 days/week                                |
| Fruit                                | <1 day/week                       | 1-2 days/week                                                            | 3-6 days/week                    | Daily                                        |
| Vegetables                           | <1 day/week                       | 1-2 days/week                                                            | 3-6 days/week                    | Daily                                        |
| Cereals                              | <1 day/week                       | 1-2 days/week                                                            | 3-6 days/week                    | Daily                                        |
| Bread                                | None                              | White                                                                    | White and whole grain            | Whole grain                                  |
| Olive oil <sup>1</sup>               | Never/Rarely                      | Tertile 1 of intake                                                      | Tertile 2 of intake              | Tertile 3 of intake                          |
| Dairy                                | Full-fat milk and full-fat cheese | Semi-skimmed milk and full-fat cheese / full-fat milk and low-fat cheese | Skimmed milk and full-fat cheese | Skimmed/Semi-skimmed milk and low-fat cheese |
| Alcohol <sup>2</sup>                 | > 4 glasses wine/day              | 3-4 glasses wine/day                                                     | No consumption                   | >0-2 glasses wine/day                        |

<sup>1</sup>The frequency of olive oil consumption was not available so this component was modified from the original score used (1 = <1 day/week; 2 = 1-2 days/week; 3 = 3-6 days/week; 4 = daily) to the quantity of weekly consumption (never/rarely consumed and tertiles of weekly consumption).

<sup>2</sup>Alcohol included as an additional component of the Elderly Dietary Index in sensitivity analysis only. 1 glass = 175 ml.

**Online Supporting Material**

**SUPPLEMENTAL FIGURE 1** Distribution of the Healthy Diet Indicator (HDI) scoring in British Regional Heart Study participants (1998/2000), n = 3133

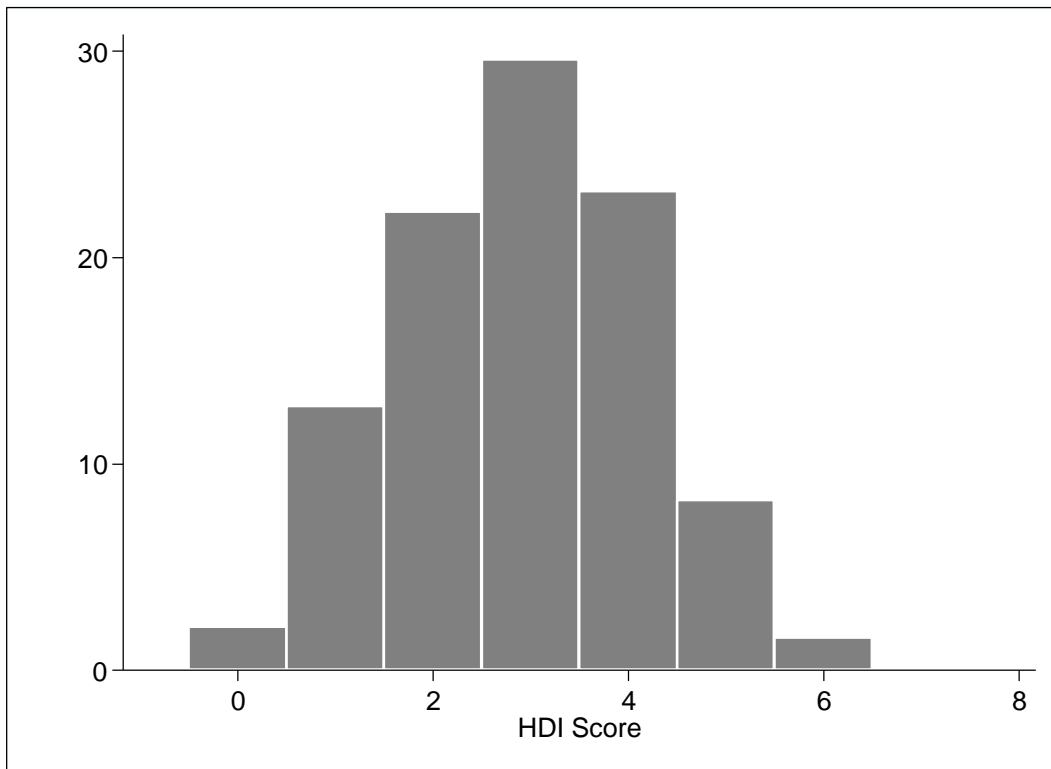

**Online Supporting Material**

**SUPPLEMENTAL FIGURE 2** Distribution of the Elderly Dietary Index (EDI) scoring in British Regional Heart Study participants (1998/2000), n = 3269

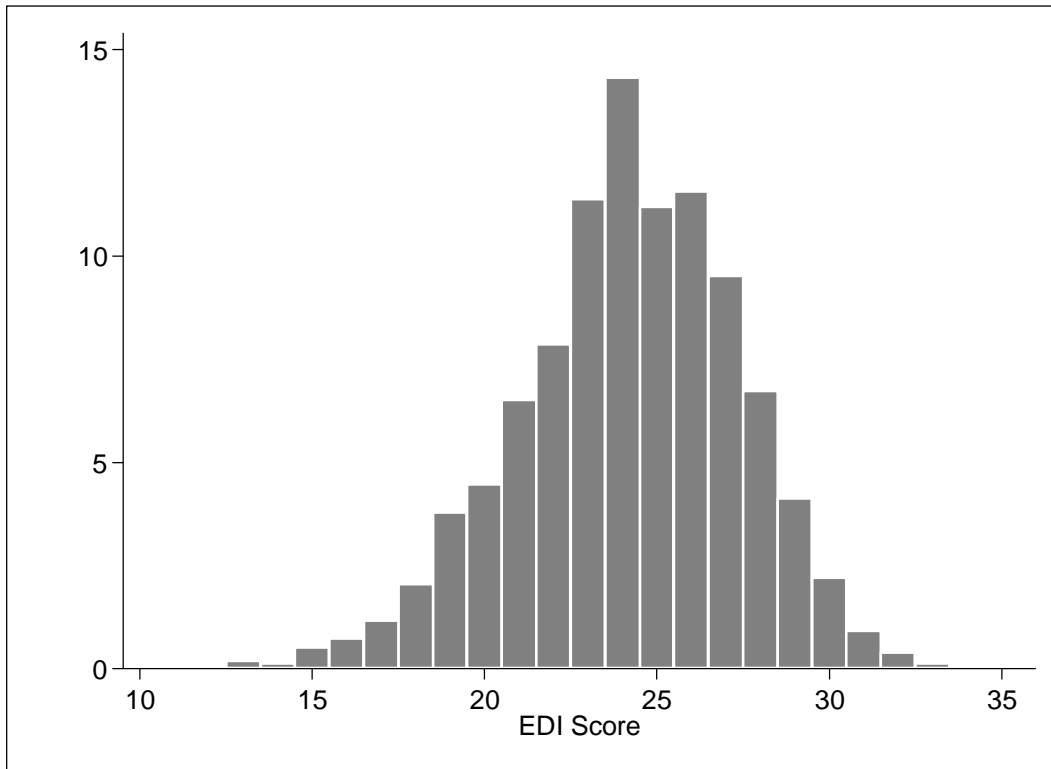

Supplement: jn.113.186486_nutrition186486SupplementaryData1.pdf [file jn.113.186486_nutrition186486SupplementaryData1.pdf]
